# Supplementary material
Source: PubMed Central journal article supplement (PMC7423415)
Supplement: rsif20200378supp1.pdf [file rsif20200378supp1.pdf]

## Supplementary materials

### Functional significance of graded properties of insect cuticle supported by an evolutionary analysis

Jafarpour, M.<sup>1,2</sup>, Eshghi, Sh.<sup>1</sup>, Darvizeh, A.<sup>2</sup>, Gorb, S.<sup>1</sup> and Rajabi, H.<sup>1\*</sup>

<sup>1</sup> Institute of Zoology, Functional Morphology and Biomechanics, Kiel University, Kiel, Germany

<sup>2</sup> Faculty of Mechanical Engineering, University of Guilan, Rasht, Iran

\* Corresponding author: [hrajabi@zoologie.uni-kiel.de](mailto:hrajabi@zoologie.uni-kiel.de); [harajabi@hotmail.com](mailto:harajabi@hotmail.com)

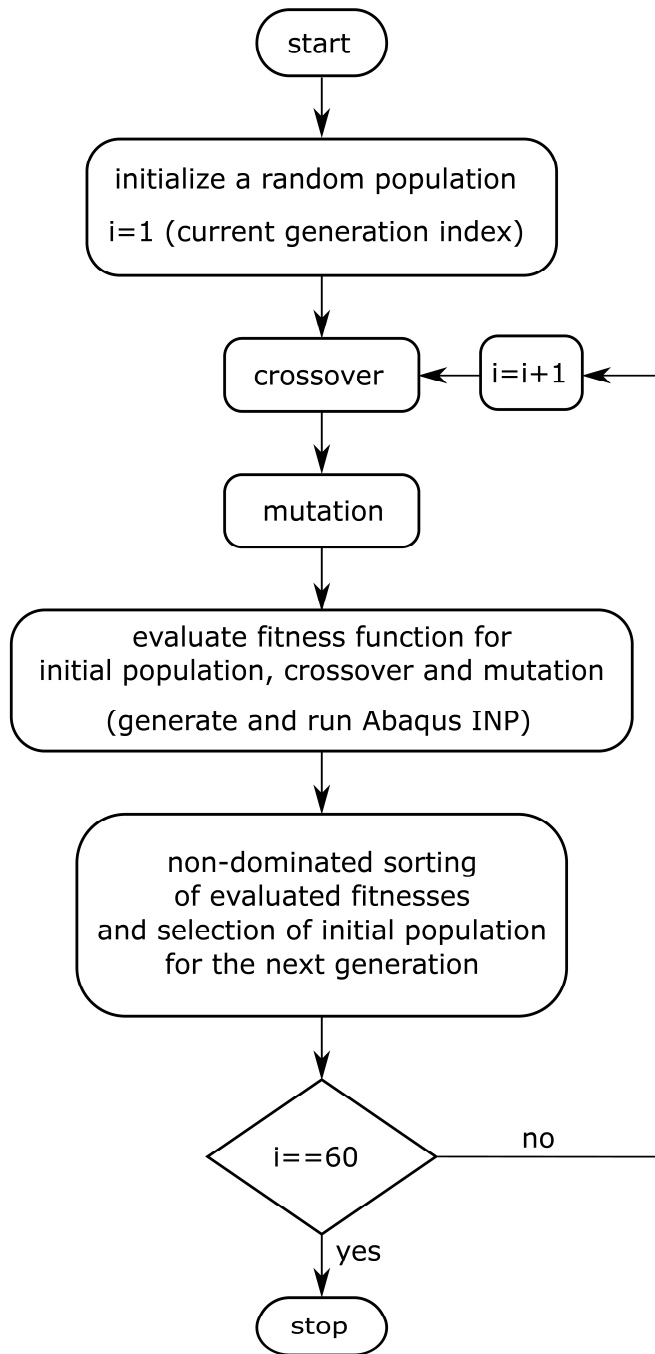

**Fig. S1:** Flowchart of the genetic algorithm (GA).

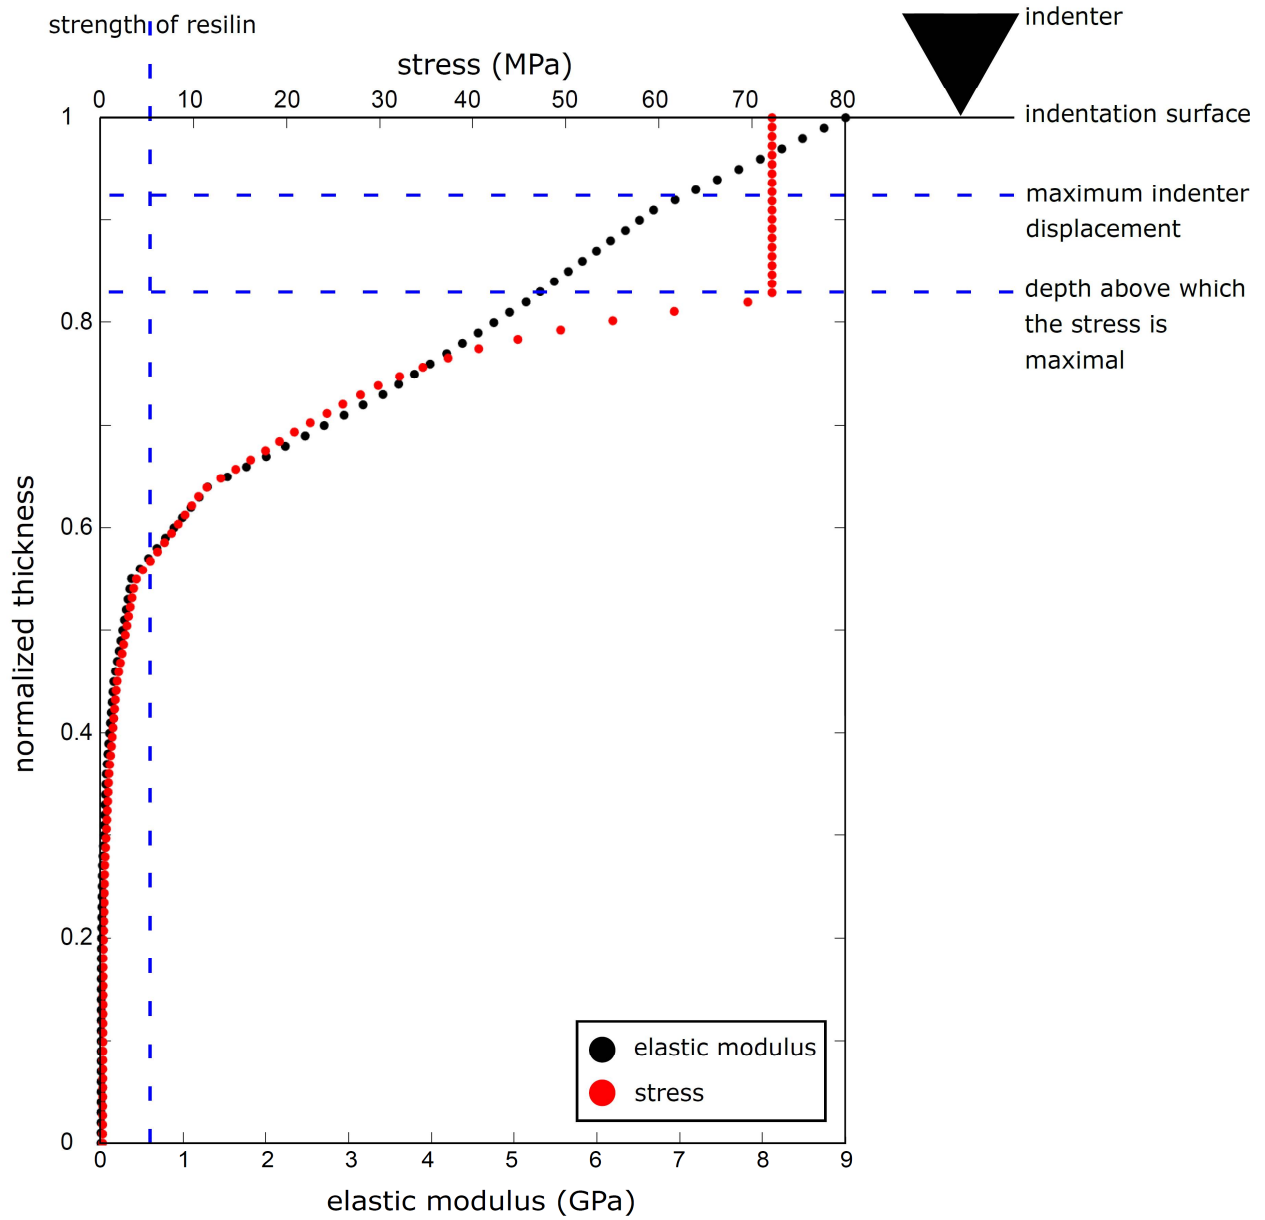

**Fig. S2:** Variation of the stress with depth in a representative optimal model. The stress is the greatest in a region beneath the indenter and quickly drops below the strength of constituent components.

**Table S1:** Normalized root mean square error (NRMSE) of standard functions in prediction of optimal gradients. C-EXP, continuous exponential function; C-LG, continuous logistic function; C-LIN, continuous linear function; DC-CST, discontinuous constant function; DC-EXP, discontinuous exponential function; DC-LIN, discontinuous linear function; s.d., standard deviation.

| model  | NRMSE |      |
|--------|-------|------|
|        | mean  | s.d. |
| C-LIN  | 0.38  | 0.07 |
| C-EXP  | 0.14  | 0.07 |
| C-LG   | 0.20  | 0.03 |
| DC-LIN | 0.07  | 0.02 |
| DC-EXP | 0.04  | 0.02 |
| DC-CST | 0.10  | 0.04 |

**Table S2:** Normalized root mean square error (NRMSE) of standard functions in prediction of the mean values of the optimal gradients. C-EXP, continuous exponential function; C-LG, continuous logistic function; C-LIN, continuous linear function; DC-CST, discontinuous constant function; DC-EXP, discontinuous exponential function; DC-LIN, discontinuous linear function.

| model  | NRMSE |  |
|--------|-------|--|
|        | mean  |  |
| C-LIN  | 0.36  |  |
| C-EXP  | 0.08  |  |
| C-LG   | 0.19  |  |
| DC-LIN | 0.06  |  |
| DC-EXP | 0.03  |  |
| DC-CST | 0.11  |  |

**Video S1:** Loading and unloading on a representative model. The video shows the deformation of the model and the stress within it during loading and after unloading.

**Data S1:** Results of the GA. The excel file contains optimization objectives, optimization variables, and thickness of the layers of the optimal cuticles.

**Data S2:** ABAQUS *.inp* file. The file contains details of a representative optimal model.
